# Supplementary material
Source: publisher figshare collection journal article supplement (https://future-science-group.figshare.com/articles/dataset/_/22005176)
Supplement: Supplementary file 1 [file 1]

**Supporting Information**

**PolyIC-coated Prussian blue nanoparticles as a dual-mode HIV latency reversing agent**

This supporting information document contains:

Figure S1. Standard curve generated from different concentration of PolyIC-PBNP using UV-Vis Spectroscopy

Figure S2. Scatter plots showing representative gating strategy for J-Lat.

Figure S3. Scatter plots showing representative gating strategy for CD3, CD3+CD4+CD69+ and CD3+CD8+CD69+ T cells.

Supporting Information Figure Legends:

**Figure S1.** Standard curve generated from different concentration of PolyIC-PBNP using UV-Vis Spectroscopy, taking into consideration the absorbance of the protein (Poly(I:C)) at OD260 nm.

**Figure S2.** Scatter plots showing gating strategy for J-Lat.

**Figure S3.** Scatter plots showing gating strategy for CD3, CD3+CD4+CD69+ and CD3+CD8+CD69+ T cells.
